# Supplementary material for: Orange- to green-emitting Li(Sr,Ca)4(BO3)3:Eu2+ phosphor: emission-tunable properties and white light emitting diode application
Source: Royal Society of Chemistry journal article supplement (doi:10.1039/c6ra13029a), 2016-01-01
Supplement: c6ra13029a1.pdf [file c6ra13029a1.pdf]

## Supporting information

### Orange- to green- emitting Li(Sr, Ca)<sub>4</sub>(BO<sub>3</sub>)<sub>3</sub>: Eu<sup>2+</sup> phosphor: emission-tunable properties and white light emitting diodes application

Hua Yu<sup>1</sup>, Degang Deng<sup>2\*</sup>, Youjie Hua<sup>2</sup>, Chenxia Li<sup>2</sup>, Shiqing Xu<sup>2\*</sup>

Table S1 The excitation, emission, Stokes shift, crystal field splitting and FWHM for LiSr<sub>3.98-x</sub>Ca<sub>x</sub>(BO<sub>3</sub>)<sub>3</sub>: 0.02Eu<sup>2+</sup>

| Sample | Excitation maximum (nm) | Emission maximum (nm) | Stokes shift (cm <sup>-1</sup> ) | CFS (cm <sup>-1</sup> ) | FWHM (nm) |
|--------|-------------------------|-----------------------|----------------------------------|-------------------------|-----------|
| x=0    | 385                     | 618                   | 10 134                           | 1 939                   | 106       |
| x=0.2  | 385                     | 607                   | 9 841                            | 1 939                   | 111       |
| x=0.4  | 390                     | 600                   | 9 649                            | 1 603                   | 126       |
| x=0.6  | 364                     | 587                   | 9 280                            | 3 434                   | 157       |
| x=0.8  | 352                     | 520                   | 7 085                            | 4 371                   | 106       |
| x=1.0  | 350                     | 515                   | 6 898                            | 4 371                   | 95        |
| x=1.2  | 349                     | 507                   | 6 591                            | 4 615                   | 91        |
| x=1.5  | 348                     | 501                   | 6 357                            | 4 697                   | 80        |

Table S2 The emission peak value and the normalized intensity of two sub emission bands

| Sample | Gaussian Peak (1) |                      | Gaussian Peak (2) |                      |
|--------|-------------------|----------------------|-------------------|----------------------|
|        | Peak Value (nm)   | Normalized Intensity | Peak Value (nm)   | Normalized Intensity |
| x=0    | 524               | 0.10                 | 612               | 0.99                 |
| x=0.2  | 520               | 0.13                 | 610               | 0.97                 |
| x=0.4  | 518               | 0.16                 | 604               | 0.95                 |
| x=0.6  | 516               | 0.47                 | 585               | 0.89                 |
| x=0.8  | 514               | 0.56                 | 575               | 0.45                 |

|         |     |      |     |      |
|---------|-----|------|-----|------|
| $x=1.0$ | 510 | 0.63 | 566 | 0.33 |
| $x=1.2$ | 503 | 0.77 | 548 | 0.43 |
| $x=1.5$ | 493 | 0.80 | 528 | 0.51 |

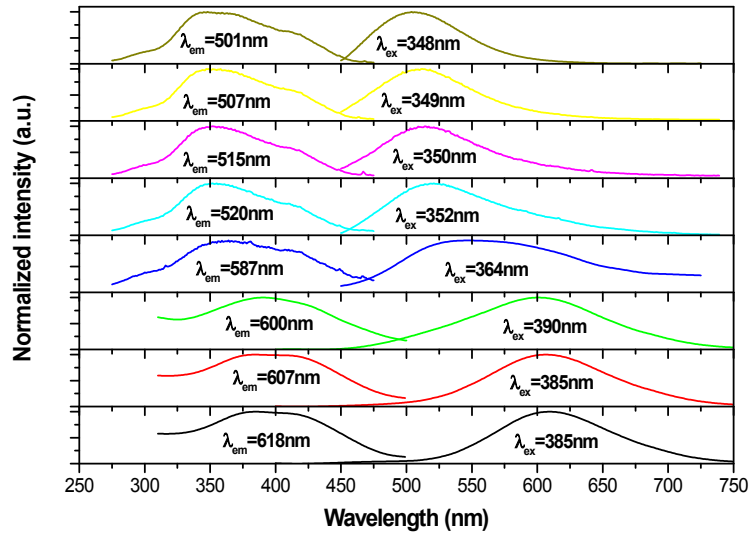

Figure S1 Normalized excitation (left) and emission (right) spectra of  $\text{LiSr}_{3.98-x}\text{Ca}_x(\text{BO}_3)_3:0.02\text{Eu}^{2+}$

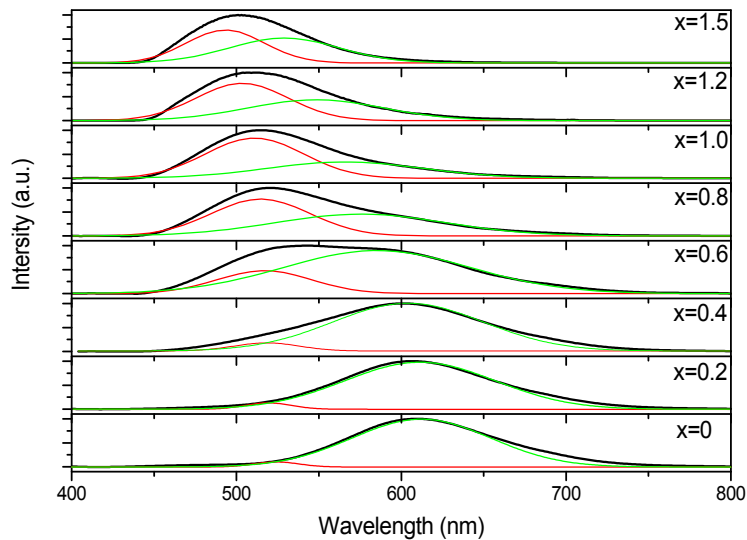

Figure S2 Normalized emission spectra of  $\text{LiSr}_{3.98-x}\text{Ca}_x(\text{BO}_3)_3:0.02\text{Eu}^{2+}$  phosphors ( $\lambda_{\text{ex}}=360$  nm), and deconvoluted Gaussian components (red and green solid lines)
